# Supplementary material for: Immobilizing CdS quantum dots and dendritic Pt nanocrystals on thiolated graphene nanosheets toward highly efficient photocatalytic H2 evolution
Source: Royal Society of Chemistry journal article supplement (doi:10.1039/c3nr03043a), 2013-01-01
Supplement: c3nr03043a.pdf [file c3nr03043a.pdf]

*Supporting Information for*

**Immobilizing CdS Quantum Dots and Dendritic Pt Nanocrystals on  
Thiolated Graphene Nanosheets toward Highly Efficient  
Photocatalytic H<sub>2</sub> Evolution**

*Zheng Fang, Yabo Wang, Jibin Song, Yimin Sun, Jiajing Zhou, Rong Xu\* ,*

*Hongwei Duan\**

School of Chemical and Biomedical Engineering, Nanyang Technological University,  
70 Nanyang Drive, Singapore 637457.

Email: hduan@ntu.edu.sg; rxu@ntu.edu.sg

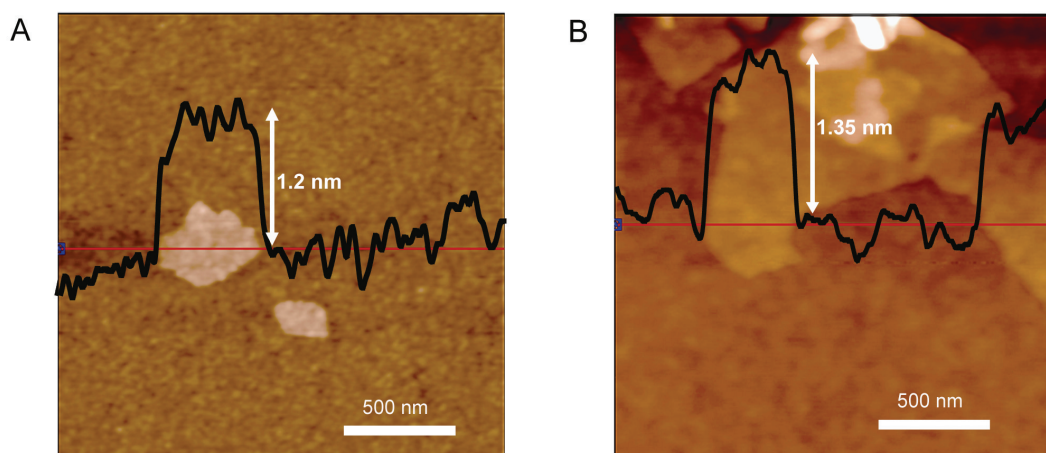

**Figure S1.** AFM images of as-synthesized GO nanosheets (A) and GO<sub>cys</sub> (B) spin-coated on silicon wafer with a 300 nm SiO<sub>2</sub> top layer.

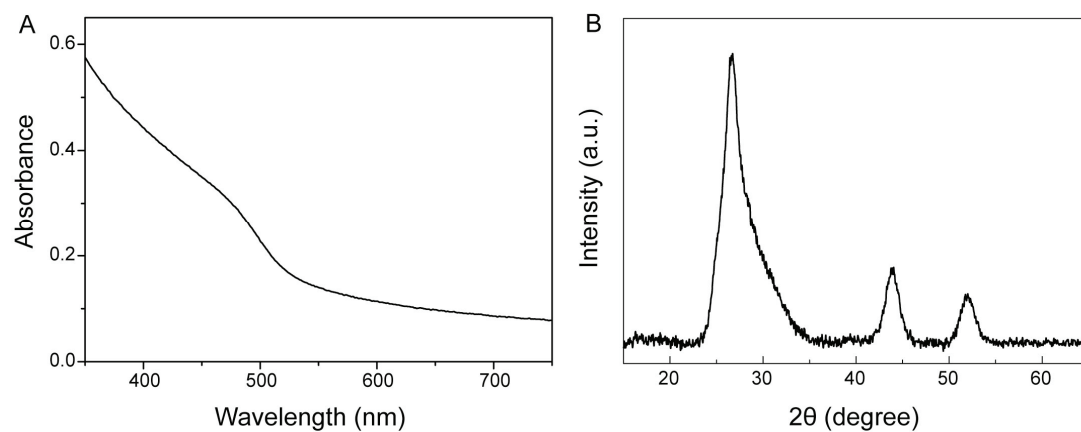

**Figure S2.** UV-vis absorption spectrum (A) and XRD pattern (B) of a bulk cubic CdS sample.

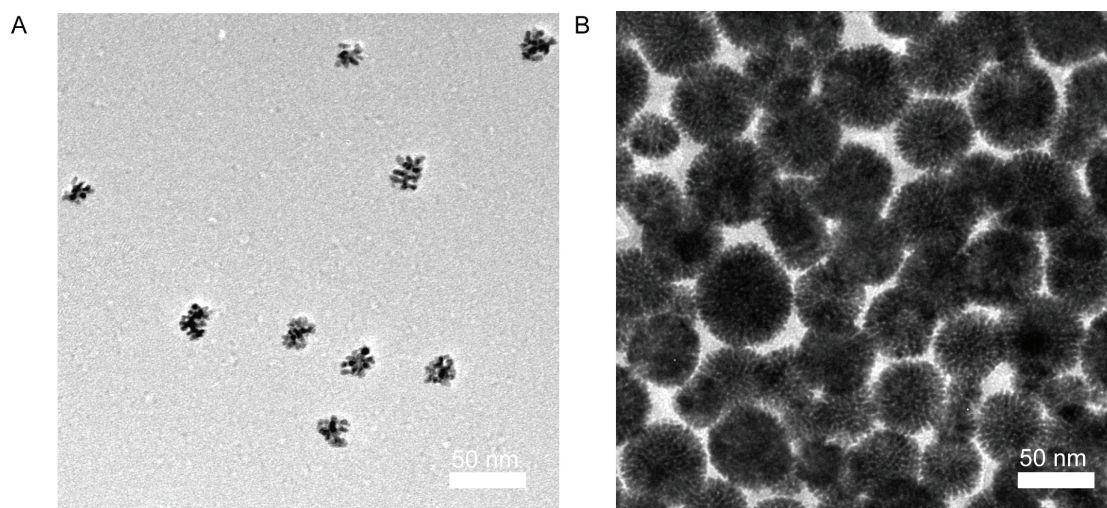

**Figure S3.** TEM images of the PVP (A) and CTAB (B) stabilized Pt nanoparticles.
